# Supplementary material
Source: publisher site journal article supplement (https://www.dovepress.com/article/553609)
Supplement: Supplementary file 1 [file 553609%20Supplementary%20Files_1.docx]

**Table S1**. Clinical data of patients with aortic dissection and control case for scRNA-seq.

| Characteristics | Normal aortic tissue | Aortic dissection tissue No. 1 | Aortic dissection tissue No. 2 |
| --- | --- | --- | --- |
| Gender | Male | Female | Male |
| Age | 44 | 64 | 55 |
| Diagnosis | Organ donor | Aortic dissection | Aortic dissection |
| History of hypertension | No | Yes | Yes |
| History of diabetes | No | No | No |
| Coronary artery disease | No | Yes | No |
| Aortic valve regurgitation | No | Yes | Yes |
| Bicuspid aortic valve | No | No | No |
| Atherosclerosis | No | Yes | No |
| Immune-related diseases | No | No | No |
| Immune-related diseases | Yes | Yes | No |
| Time from onset to sample collection (hours) | - | 15 | 11 |

**Table S2**. Seven hub gene primer sequences detail.

| Gene | Forward primer | Reverse primer |
| --- | --- | --- |
| AR | AAGGATGGAAGTGCAGTTAG | GTCCACCGGGTTCTCCAGCT |
| CDKN1A | CGATGGAACTTCGACTTTGTCA | GCACAAGGGTACAAGACAGTG |
| MYC | CTTATTTAACGGGCCACTCT | GCAAGGATTTGCTTTTCAGT |
| IGFBP3 | GGCTCTGCGTCAACGCTAGT | TTTGTAGCGCTGGCTGTCTTTAG |
| SOD2 | GCAGTGTGCGGCACCAGCAG | TCCCTTGGCCAACGCCTCCT |
| HIFIA | CACCACAGGACAGTACAGGAT | CGTGCTGAATAATACCACTCACA |
| ESR1 | GCTTACTGACCAACCTGGCAGA | GGATCTCTAGCCAGGCACATTC |

**Table S3**. Differential genes from GSE52093 and GSE153434.

|  | GSE52093 | | GSE153434 | |
| --- | --- | --- | --- | --- |
| symbol | logFC | P.Value | logFC | P.Value |
| SERPINE1 | 2.23744318 | 9.85E-07 | 2.9496862 | 3.69E-07 |
| HIF1A | 1.615135276 | 8.70E-06 | 1.3014172 | 1.87E-05 |
| MT1E | 1.715617876 | 4.90E-05 | 1.2666028 | 0.000132745 |
| IL6 | 5.583193084 | 0.000187174 | 2.1345952 | 0.000306765 |
| IGFBP3 | 2.958376026 | 0.000271413 | 2.1095184 | 0.000326695 |
| PDGFRA | 0.905330144 | 0.000401814 | 1.704096 | 0.000629439 |
| MYC | 2.427111368 | 0.000479522 | 2.5092067 | 0.000696592 |
| CDKN1A | 1.37597568 | 0.000481358 | 1.381715 | 0.001011356 |
| SOD2 | 2.442397938 | 0.001096133 | 1.2215089 | 0.00189191 |
| CHEK2 | 1.768481818 | 0.002303814 | 1.4504785 | 0.009404457 |
| ARNTL | 0.843918738 | 0.012233486 | 1.9386347 | 0.036803419 |
| JAK2 | -1.980581672 | 5.12E-07 | -1.525551 | 8.93E-08 |
| AGTR1 | -2.719190822 | 0.000130163 | -2.0395738 | 0.000413732 |
| ESR1 | -1.785670584 | 0.000295051 | -1.0373195 | 0.000637849 |
| ADCY5 | -1.925308634 | 0.006695006 | -1.1092839 | 0.001531101 |
| AR | -1.201894898 | 0.013704737 | -1.0454976 | 0.001780313 |


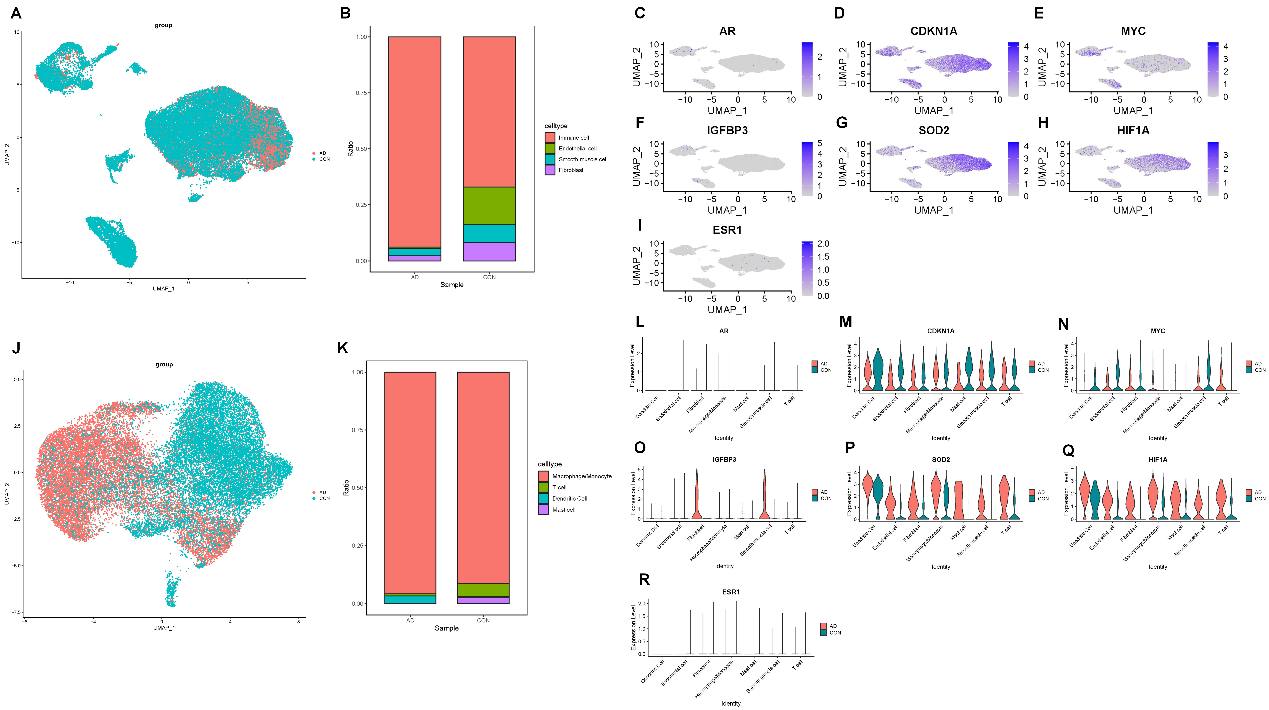


**Figure S1**. Cellular heterogeneity present in aortic dissection (AD) tissues compared to normal aortic tissue (A); Drastic reduction in the presence of other cell types such as endothelial cells and SMCs compared to controls (B); The expression of seven hub genes across these cell types, AR (C); CDKN1A (D); MYC (E); IGFBP3 (F); SOD2 (G); HIF1A (H); ESR (I); Macrophage subclusters to explore the characteristics of aortic dissection and normal control (J); Presence of immune cell types such as macrophages, T cells, dendritic cell, and mast cell (K); The violin plot shown expression of seven hub genes across these cell types between AD and normal controls tissue, AR (L); CDKN1A (M); MYC (N); IGFBP3 (O); SOD2 (P); HIF1A (Q); ESR (R).
